# Supplementary material for: Ophthalmic statistics note 1: unit of analysis
Source: PubMed Central journal article supplement — Br J Ophthalmol. 2013 Dec 19;98(3):408–12. doi: 10.1136/bjophthalmol-2013-304587 (PMC4107464; doi:10.1136/bjophthalmol-2013-304587), 2013-12-19
Supplement: bjophthalmol-2013-304587-s1.pdf [file bjophthalmol-2013-304587-s1.pdf]

Figure 3: Results of t-tests for Scenario 2, Table 2

. ttest select1, by(lens)

Two-sample t test with equal variances

| Group    | Obs | Mean  | Std. Err. | Std. Dev. | [95% Conf. Interval] |          |
|----------|-----|-------|-----------|-----------|----------------------|----------|
| A        | 10  | .226  | .0262552  | .0830261  | .1666067             | .2853933 |
| B        | 10  | .089  | .0175404  | .0554677  | .0493208             | .1286792 |
| combined | 20  | .1575 | .0219794  | .0982947  | .1114967             | .2035033 |
| diff     |     | .137  | .0315753  |           | .0706627             | .2033373 |

diff = mean(A) - mean(B) t = 4.3388  
 Ho: diff = 0 degrees of freedom = 18

Ha: diff < 0 Ha: diff != 0 Ha: diff > 0  
 Pr(T < t) = 0.9998 Pr(|T| > |t|) = 0.0004 Pr(T > t) = 0.0002

. ttest select2, by(lens)

Two-sample t test with equal variances

| Group    | Obs | Mean  | Std. Err. | Std. Dev. | [95% Conf. Interval] |           |
|----------|-----|-------|-----------|-----------|----------------------|-----------|
| A        | 10  | .106  | .0265497  | .0839577  | .0459403             | .1660597  |
| B        | 10  | .205  | .0308851  | .0976672  | .1351331             | .2748669  |
| combined | 20  | .1555 | .0228436  | .1021596  | .1076878             | .2033122  |
| diff     |     | -.099 | .0407281  |           | -.1845666            | -.0134334 |

diff = mean(A) - mean(B) t = -2.4308  
 Ho: diff = 0 degrees of freedom = 18

Ha: diff < 0 Ha: diff != 0 Ha: diff > 0  
 Pr(T < t) = 0.0129 Pr(|T| > |t|) = 0.0257 Pr(T > t) = 0.9871

. ttest select3, by(lens)

Two-sample t test with equal variances

| Group    | Obs | Mean  | Std. Err. | Std. Dev. | [95% Conf. Interval] |          |
|----------|-----|-------|-----------|-----------|----------------------|----------|
| A        | 10  | .191  | .0378726  | .1197637  | .1053262             | .2766738 |
| B        | 10  | .128  | .0179382  | .0567255  | .087421              | .1685789 |
| combined | 20  | .1595 | .0216367  | .0967621  | .114214              | .204786  |
| diff     |     | .063  | .041906   |           | -.0250412            | .1510412 |

diff = mean(A) - mean(B) t = 1.5034  
 Ho: diff = 0 degrees of freedom = 18

Ha: diff < 0 Ha: diff != 0 Ha: diff > 0  
 Pr(T < t) = 0.9250 Pr(|T| > |t|) = 0.1501 Pr(T > t) = 0.0750
